# Supplementary material for: Building a Global Food Systems Typology: A New Tool for Reducing Complexity in Food Systems Analysis
Source: Frontiers journal article supplement (doi:10.3389/fsufs.2021.746512), 2021-11-18
Supplement: Table_1.xlsx [file Table_1.xlsx]

## Sheet: Data
AreaID	Country	Agriculture, value added per worker	% Dietary energy from staples	Supermarkets per 100,000 inh.	% Urban population	Sum of ranks	Food system type	Fertilizer consumption	Vegetable losses	Ultra-processed food sales growth (average annual growth, 5 yr)	CoRD as % of food exp	Vegetable intake (grams/day)	Red meat intake (grams/day)	Anemia among WRA	Obesity among adults	Total ecological footprint of production (global ha)	GHGe from food consumption	Water use from food consumption	Eutrophication from food consumption
AFG	Afghanistan	1251.9	74	0.17	25.754	577	1	12.18	8.7	2.66129		71.75	9.62	42	5.68	0.57	1039.77	256.698	5123.49
AGO	Angola	1316.52	61	0.62	66.177	438	2	7.98	10.9	5.46154	109.4	129.16	16.97	47.7	8.42	0.77	3537.64	132.689	5850.42
ALB	Albania	6134.99	36	10.05	61.229	230	4	126.14	9.7	4.3272	46.48	400.46	28.07	25.3	22.55	1.38	2804.48	357.341	8823.58
ARE	United Arab Emirates	29746.7	42	3.69	86.789	185	4	714.93	14.3	8.05945	46.93	169.45	20.09	27.8	35.45	7.73	2046.5	418.73	9944.79
ARG	Argentina	1.85501e+06	36	3.68	91.991	127	5	50.34	10.5	-5.79722	44.02	133.24	66.9	18.6	29.19	5.77	10088.1	268.984	20191.6
AUS	Australia	72841.6	25	16.73	86.124	53	5	68.1	5.1	-1.99888	35.05	163.57	67.01	9.1	30.04	11.27	11527.8	166.79	24892.1
AUT	Austria	38281.4	27	33.46	58.515	117	5	141.84	10.2	0.751061	40.03	173.99	77.11	17.3	20.88	4.75	2867.45	376.567	14125.4
AZE	Azerbaijan	2500.05	61	6.22	56.031	383	2	14.09	3.6	-8.6497	35.57	363.03	19.25	38.5	20.51	1.8	1853.96	378.514	9296.13
BEL	Belgium	45228.8	30	12.68	98.041	68	5	318.49	5.5	-0.805279	34.81	221.21	49.54	16.2	22.93	3.73	2570.03	362.236	9244.21
BEN	Benin	2186.92	66	0.39	47.861	495	1	14.75	8.1	3.28276	207.06	80.04	4.53	46.9	9.87	1.06	1721.38	222.182	5436.92
BFA	Burkina Faso	1619.27	64	0.44	29.98	525	1	21.77	6.8	5.35784	228.53	43.88	11.82	49.6	5.6	1.16	2030.51	288.071	7183.84
BGD	Bangladesh	1032.09	79	0.11	37.405	568	1	289.4	8.3	10.8369	79.58	56.54	2.41	39.9	3.78	0.6	1078.48	422.61	7660.46
BGR	Bulgaria	11462.8	38	6.45	75.347	206	4	125.54	6.6	0.316804	63.09	345.34	50.61	26.4	25.82	4.54	1877.03	208.129	9184.43
BHS	Bahamas	20374.3	22	13.74	83.132	90	5	144.02	4.4	1.40367	67.98	176.18	37.15	23.1	32.39	2.22
BIH	Bosnia and Herzegovina	7190.06	46	8.6	48.626	295	3	131.8	7.5	-1.76349	51.93	321.07	15.15	29.4	18.54	3.68	1842.23	244.818	8945.83
BLR	Belarus	11306.6	38	8.32	79.044	187	4	146.62	5.7	-4.77991	49.96	279.97	48.94	22.6	25.13	4.72	2430.99	293.588	15282.8
BLZ	Belize	4526.87	40	3.13	45.866	338	3	466.25	12	1.76098	114.41	98.17	14.68	21.7	24.92	3.63
BOL	Bolivia	1839.88	50	0.59	69.773	389	2	7.61	7.5	5.75908	23.01	70.29	30.59	30.2	20.82	3.24	4896.8	162.518	12952.1
BRA	Brazil	13775.6	32	1.38	86.824	195	4	186.1	10.2	-5.34171	68.3	95.77	54.6	27.2	22.84	3.63	7295.22	329.362	16801.5
BWA	Botswana	1696.69	48	6.03	70.172	326	3	89.57	5.7	3.51347	32.83	71.85	13.06	30.2	19.5	2.19	11382.6	207.96	11154.9
CAF	Central African Republic	409.748	57	0.51	41.77	515	1	0.34	8.3	6.18689	279.56	35.72	22.6	46	7.64	1.22	7518.88	119.507	8373.98
CAN	Canada	99708.4	28	6.82	81.482	98	5	87.63	4.7	-2.93875	48.48	192.9	47.82	9.5	30.46	11.63	2792.38	248.318	13859
CHE	Switzerland	29726.2	24	36.04	73.849	84	5	214.41	2.9	-0.518151	32.66	169.38	52.38	18.3	20.3	2.21	2771.8	407.267	15444.5
CHL	Chile	11724.2	43	6.2	87.643	196	4	293.85	17.5	0.257641	50.42	196.68	46.63	15	28.93	5.02	1849.95	239.104	12365.6
CHN	China	4188.38	51	10.04	60.308	302	3	503.32	7.7	3.30965	134.81	242.86	43.43	26.4	6.47	3.42	2002.79	447.788	10995.9
CIV	Cote dIvoire	2594.36	68	1.18	51.239	456	2	51.68	8	6.81915	102.45	82.72	3.99	52.9	10.96	1.37	2713.77	219.196	7925.41
CMR	Cameroon	1167.95	57	0.46	56.968	464	2	9.67	6.2	6.41479	154.64	187.69	8.49	41.4	11.78	1.25	2261.96	217.026	6046.74
COG	Congo	1081.44	60	0.71	67.373	433	2	1.84	3.1	2.04863	154.68	77.39	5.33	51.9	9.94	0.88	3187.7	122.695	6524.06
COL	Colombia	6153.16	35	4.08	81.104	219	4	659.45	5.8	-4.51926	76.82	79.94	22.91	21.1	22.99	1.7	2758.77	266.522	11179.8
CPV	Cape Verde	4295.05	52	0.74	66.195	368	3		6.5	-0.146682	80.77	139.02	24.47	33.3	12.11	1.5	1640.93	308.214	7535.85
CRI	Costa Rica	10656.9	31	6.52	80.076	174	4	604.89	4.2	1.69146	64.1	95.8	23.7	14.9	26.68	1.84	2442.21	398.523	12892.3
CUB	Cuba	3225.03	47	5.25	77.109	287	3	49.45	8.4	0.540634		249.96	22.81	25.1	25.63	1.21	2983.03	327.216	10674.4
CYP	Cyprus	44389.9	33	21.19	66.805	131	5	196.74	6.6	-1.64409	49.85	169.94	40.13	25.2	22.59	2.18	1914.37	306.354	8571.9
CZE	Czech Republic	27379.6	28	7.65	73.921	136	5	196.15	1	0.719213	41.01	132.57	45.79	25.7	26.91	5.82	2484.42	282.977	11600.9
DEU	Germany	49232.8	28	16.85	77.376	85	5	197.23	9.2	-0.562666	38.47	156.07	52.82	16.3	23.19	4.47	2487.84	355.736	9549.83
DNK	Denmark	59088.9	30	10.52	87.994	83	5	131.15	5	0.692118	35.81	198.86	48.03	16.3	20.43	4.98	2886.24	344.436	10824.1
DOM	Dominican Republic	11261.2	29	2.9	81.828	188	4	88.09	8.5	1.75652	52.4	97.88	18.84	29.7	28.6	1.25	1935.98	276.995	8594.49
DZA	Algeria	19800.6	53	0.62	73.189	309	3	22.32	8	5.62315	66.63	258.94	10.92	35.7	28.45	1.6	1788.3	406.856	7713.32
ECU	Ecuador	3936.44	48	2.21	63.986	344	3	345.44	8.2	1.13964	74.15	90.62	32.15	18.8	20.55	2.39	2685.04	325.334	13509.9
EGY	Egypt	5704.04	66	6.61	42.73	390	2	649.19	8.5	-4.29275	41.28	396.79	13.5	28.5	32.99	1.35	2580.1	585.889	17859.4
ESP	Spain	49751.3	27	33.05	80.565	66	5	143.97	8.6	-1.33223	38.02	204.06	49.23	16.6	24.64	3.44	2664.63	372.991	11020.9
EST	Estonia	33383.2	36	38.16	69.051	127	5	112.68	1.9	0.450801	39.33	200.77	35.83	25.6	21.94	10.4	2159.1	287.345	12249.3
ETH	Ethiopia	591.274	75	0.04	21.225	605	1	14.43	8.4	7.63243	238.68	42.11	6.48	23.4	4.62	1	1349.82	209.239	4475.79
FIN	Finland	70931.1	32	12.4	85.446	88	5	80.51	5.5	-1.58822	38.74	142.42	44.29	15.9	23.06	11.48	2743.92	380.106	9844.91
FJI	Fiji	2827.53	45	4.08	56.75	336	3	46.03	6.3	2.39781	52.67	79.09	19.47	31	31.23	2.09	1589.94	221.916	6912.23
FRA	France	65684.7	30	11.92	80.709	94	5	163.14	10.6	-1.28345	39.25	162.52	52.27	18.1	22.42	3.51	3092.22	354.755	11791.5
GAB	Gabon	5815.4	52	3.96	89.741	267	3	26.77	6.4	4.43967	87.02	87.79	14.88	59.1	15.61	1.95	4153.79	236.841	12659
GBR	United Kingdom	51040.2	32	6.97	83.652	118	5	252.9	7	-1.86971	35.31	164.08	36.96	15.3	28.8	2.84	2729.58	303.159	10318.7
GEO	Georgia	1663.22	54	6.11	59.039	370	3	170.83	4.9	-0.460907		139.48	17.05	27.5	22.34	1.42	1348.17	301.301	6298.42
GHA	Ghana	3364.76	65	0.08	56.707	474	2	20.88	7.3	3.6077	282.47	76.37	4.3	46.4	11.05	1.78	2297.67	185.215	5999.46
GIN	Guinea	772.532	63	0.44	36.5	536	1	1.57	7	6.41737	127.48	101.05	6.16	50.6	7.94	1.38	1953.89	287.442	7072.46
GNB	Guinea-Bissau	829.718	64	0.53	43.777	512	1		18	2.83684	110.89	41.73	12.92	43.8	9.77	1.63	1569.95	276.573	6505.14
GRC	Greece	20753.2	32	45.85	79.388	99	5	123.01	11.8	-3.58414	35.1	293.33	48.74	15.9	25.74	3.31	3238.58	449.063	15900.7
GTM	Guatemala	2891.94	48	1.4	51.439	390	2	303.15	12	8.54688		117.79	9.82	16.4	21.56	1.57	1564.61	142.337	5526.36
GUY	Guyana	8507.3	46	3.34	26.689	362	3	44.6	8.7	-0.519846	130.24	131.61	5.96	32.3	20.7	2.8	1945.79	328.629	9057.96
HKG	Hong Kong SAR	15304.4	30	11.61	100	100	5	2704	7.6	5.75161	37.77				11.06
HND	Honduras	2101.09	47	0.76	57.73	383	2	164.32	9.9	2.26262	103.88	98.8	12.71	17.8	22.08	1.37	2364.21	195.466	7028.66
HRV	Croatia	17706.7	32	15.58	57.242	172	4	119.31	7.3	0.409245	51.09	154.08	39.66	27.3	25.28	3.23	2160.36	280.985	10350
HTI	Haiti	1361.02	54	0.49	56.192	452	2		6.9	4.39012	184.52	38.4	8.51	46.2	23.35	0.51	1075.93	163.839	4625.59
HUN	Hungary	24551.4	29	8.63	71.644	139	5	128.25	3.2	1.96216	52.49	246.29	42.04	25.8	27.38	3.7	1966.3	278.55	9692.95
IDN	Indonesia	4052.04	69	0.52	55.985	456	2	231.37	7.7	1.41814	98.2	84.47	5.92	28.8	7.13	1.77	1316.51	367.547	7464.71
IND	India	1978.33	57	0.38	34.472	503	1	165.85	7.6	10.3687	118.18	186.18	2.2	51.4	4.09	1.09	966.974	341.235	5700.69
IRL	Ireland	32909.9	32	11.81	63.405	156	4	1247.94	7	-0.589826	51.09	169.2	64.27	14.8	26.26	5.01	3191.8	359.057	13238.2
IRN	Iran	10134.8	55	11.56	75.391	248	4	76.29	10.3	1.47172		395.83	8.81	30.5	26.73	3.21	1472.93	380.535	6579.28
IRQ	Iraq	1464.35	60	1	70.678	404	2	35.82	9	1.25689	85.91	297.79	4.7	29.1	31.32	1.5	967.818	284.255	4797
ISL	Iceland	131122	23	22.34	93.855	20	5	181.53	0	6.74897	26.66	133.89	46.77	16.1	22.68
ISR	Israel	94732.8	33	4.01	92.501	119	5	280.68	2.2	1.02567	34.52	346.63	30.86	15.7	27.06	3	2794.53	466.639	15160
ITA	Italy	43902.7	34	14.39	70.736	134	5	129.85	6.1	-1.98744	34.74	210.44	48.14	17.3	20.68	2.6	3097.62	436.854	13018.7
JAM	Jamaica	4061.4	37	3.71	55.985	305	3	57.25	8.1	-1.40197	82.93	151.76	9.17	22.5	25.31	1.21	2138.61	226.632	8547.49
JOR	Jordan	18586.3	45	6.82	91.203	179	4	112.05	9.2	4.98155	89.73	235.19	12.74	34.7	36.89	1.08	1650.25	330.644	8121.65
JPN	Japan	24168.6	41	13.7	91.698	126	5	242.19	7.7	-1.07454	63.81	250.39	25.33	21.5	4.42	3.68	1867.38	298.7	8761.57
KAZ	Kazakhstan	6789.8	34	2.23	57.54	282	3	4.33	4.8	-4.29176	36.35	386.69	44.34	30.7	21.61	6.26	3678.4	463.203	17853.4
KEN	Kenya	1119.89	60	0.4	27.507	531	1	38.18	8.2	6.57307	89.87	96.45	12.26	27.2	7.29	0.84	1727.7	209.112	7289.65
KGZ	Kyrgyzstan	2001.09	52	3.4	36.591	421	2	31.41	5.2	1.26295	84.74	289.76	25.74	36.2	17.04	1.26	1971.3	353.872	6908.32
KHM	Cambodia	1444.36	69	3.13	23.805	502	1	17.39	9.1	10.4231	108.72	74.79	12.43	46.8	3.95	1.17	1900.2	402.488	7929.76
KOR	Korea Rep	19907.5	43	19.68	81.43	148	4	380.28	12.3	3.41082	93.02	246.68	41.77	22.7	4.8	4.85	2379.56	400.458	11507.5
KWT	Kuwait	12266.4	42	4.11	100	183	4	750.72	5.4	5.05256	62.34	311.97	22.77	23.8	40.68	8.32	2657.07	449.714	12655.9
LAO	Lao PDR	827.96	63	0.77	35.645	510	1		8.2	10.218	114.95	247.89	16.32	39.7	5.46	1.71	1627.61	438.345	9698.31
LBN	Lebanon	7871.66	45	0.57	88.758	272	3	330.93	8.4	4.81909		336.63	20.84	31.2	33.41	1.66	2071.31	385.07	12685.1
LBR	Liberia	786.943	64	0.39	51.615	513	1		9.5	5.31452	714.94	60.18	4.03	34.7	10.28	1.07	1291.49	226.555	5026.35
LCA	Saint Lucia	3274.1	33	4.95	18.754	349	3	170.89	0	0.640705	203.38	110.51	16.29	21.9	20.29	1.1
LKA	Sri Lanka	2897.6	56	7.92	18.585	412	2	131.92	11.4	4.87341	85.34	85.69	1.76	32.6	5.29	1.07	1072.32	344.288	6323.59
LSO	Lesotho	1831.98	71	0.47	28.585	536	1		5	2.11108	159.63	44.41	11.53	27.4	16.3	1.18	1674.75	142.116	6010.47
LTU	Lithuania	13874.6	36	18.96	67.855	168	4	131.87	4.2	0.892446	28.18	209.22	46.27	25.5	26.98	5.89	2354.32	324.163	10939.7
LUX	Luxembourg	35492.8	26	22.54	91.223	51	5	262.11	1.6	0.181791	29.5	179.91	64.47	16.1	23.48	6.18	3970.59	334.572	17276.7
LVA	Latvia	19850.1	37	15.47	68.222	165	4	104.19	3.9	-0.572411	45.74	212.31	38.46	25.1	24.28	7.91	2276.82	286.646	10618.1
MAR	Morocco	3885.7	62	0.95	62.994	400	2	71.11	8.3	3.13265	67.44	254.04	11.02	36.9	26.8	1.24	1919.02	487.579	8699.27
MDA	Republic of Moldova	3472.22	47	6.2	42.726	351	3	24.41	6.6	1.87962	42.77	199.74	17.76	26.8	19.42	1.92	1459.01	209.403	7781.98
MDG	Madagascar	358.956	79	0.39	37.861	569	1	5.18	8.5	4.03836	188.26	35.43	9.85	36.8	5.5	0.89	3106.13	278.391	7818.14
MDV	Maldives	7635.94	44	4.07	40.238	331	3	314.9	0	6.08055	135.16	154.51	7.47	42.6	8.98
MEX	Mexico	6057.27	44	0.94	80.444	289	3	114.01	5.9	-2.39484	41.55	119.72	30.45	14.6	29.55	2.1	3526.25	195.024	10914.3
MKD	Macedonia	7434.26	36	11.47	58.208	223	4	79.32	8.4	1.40467	48.98	311.98	21.02	23.3	23.22	2.12
MLI	Mali	1242.77	68	0.56	43.136	512	1	44.24	5.2	6.88996	123.81	116.25	17.4	51.3	8.84	1.51	4047.72	401.016	11497
MLT	Malta	58074	33	13.86	94.678	75	5	264.6	5.7	0.215088	58.64	336.37	46.89	16.4	29.87	1.35
MMR	Myanmar	1697.9	49	0.75	30.852	460	2	17.87	8.7	5.61027	111.39	163.86	14.18	46.3	5.91	1.66	1711.59	399.311	9410.91
MNE	Montenegro	20059.9	33	8.2	67.15	180	4	285.21	6	1.84593	34.87	415.16	50.62	25.2	24.11	2.09	3037.05	476.906	14740.6
MNG	Mongolia	5443.67	39	7.26	68.543	243	4	39.97	4	-0.327205	99.86	100.22	60.99	19.5	21.23	7.75	4672.44	343.266	16947.1
MOZ	Mozambique	433.539	72	0.31	36.528	575	1	3.72	7.4	-0.620924	266.43	40.1	6.77	51	7.21	0.7	1901.4	127.868	3567.64
MRT	Mauritania	1908.35	54	0.64	54.507	432	2		4.2	4.37799	132.83	46.42	17.41	37.2	13.09	2.28	3207.67	332.475	10561.8
MUS	Mauritius	12197.6	47	4.11	40.766	323	3	235.31	6.1	1.60105	40.53	144.93	12.17	25.1	11.09	1.53	2057.87	375.102	9250.23
MWI	Malawi	769.22	70	0.27	17.174	594	1	21.61	9	4.92903	219.06	45.49	5.53	34.4	5.94	0.68	1369.41	100.185	4024.06
MYS	Malaysia	19384.2	43	4.38	76.607	217	4	1723.39	4	-0.0679183	38.77	118.61	13.29	24.9	16.04	4.04	1963.27	360.832	9310
NAM	Namibia	4871.71	53	3.51	51.042	372	2	26.11	6.6	3.79908	104.4	63.6	17.99	23.2	17.17	4.29	6842.99	181.367	9508.04
NER	Niger	766.907	62	0.35	16.517	570	1	0.4	6.9	4.73334	510.25	99.02	14.99	49.5	5.84	1.6	2699.54	373.463	9381.05
NGA	Nigeria	6186.9	67	0.04	51.157	473	2	5.47	12.3	-4.27694	64.06	138.08	6.47	49.8	9.24	1	1748.07	227.743	5644.39
NIC	Nicaragua	2094.66	51	0.77	58.76	396	2	61.46	9.4	1.55857	103.06	21.98	7.59	16.3	24.35	1.81	2565.16	216.214	6403.81
NLD	Netherlands	88094	26	27.28	91.876	28	5	288.92	3	-1.93891	39.57	147.7	51.06	16.4	21.22	3.76	2997.37	412.879	10247.5
NOR	Norway	130059	31	23.11	82.616	61	5	203.9	6.4	-2.65742	46.67	134.63	47.56	15.3	23.99	10.15	2731.72	366.684	12183.2
NPL	Nepal	652.953	67	0.22	20.153	586	1	74.08	8.4	10.1225	106.43	213.93	9.6	35.1	4.22	0.8	1277.86	357.312	7316.16
NZL	New Zealand	82625	32	12.55	86.615	82	5	1777.24	7.5	0.0566612	32.75	193.89	63.62	11.6	31.83	11.3	3204.34	214.292	17341.6
OMN	Oman	15944.4	41	1.33	85.443	230	4	468.07	6.1	7.04498	43.37	221.54	24.47	38.2	29.37	6.31	2474.95	397.464	10855.7
PAK	Pakistan	1935.7	48	0.19	36.907	478	1	144.33	8.3	8.65192	105.39	55.74	10.1	52.1	9.01	0.72	1373.71	335.563	6742.96
PAN	Panama	4429.57	43	2.63	68.059	304	3	49.12	8	4.46139	60.4	58.88	30.02	23.4	23.59	2.25	3804.12	291.35	13146.4
PER	Peru	2712.58	56	0.6	78.099	377	2	127.7	11	0.887237	77.48	111.33	9.13	18.5	20.46	2.06	2572.56	234.694	7282.83
PHL	Philippines	3319.94	58	1.93	47.149	420	2	157.42	8.2	3.03592	65.68	132.66	21.65	15.7	6.67	1.03	1542.62	378.12	8603.71
POL	Poland	6716.93	37	9.75	60.037	234	4	172.82	8.4	-0.568595	40.39	246.29	49.87	25.7	23.93	4.63	2042.09	277.097	8607.1
PRT	Portugal	18140.5	31	15.35	65.764	157	4	199.4	6.9	-0.482113	29.71	265.27	56.46	17.5	21.62	3.09	2988.76	423.828	13367.2
PRY	Paraguay	6360.67	46	1.52	61.879	321	3	110.35	9.2	0.385931	66.31	97.49	39.26	22.8	21.1	5.67	6417.95	136.443	8981.11
ROU	Romania	6547.77	40	6.28	54.084	279	3	59.91	3.5	0.809508	30.96	402.22	46.91	26.7	23.39	3.22	2365.08	302.659	11445.3
RUS	Russian Federation	16503.5	41	26.49	74.587	158	4	18.46	1.9	-5.76417	37.04	186.99	34.47	23.3	23.5	6.07	2045.62	252.269	9420.47
RWA	Rwanda	592.482	51	0.31	17.313	541	1	10.86	9.7	3.36535	245.23	97.48	5.03	22.3	5.88	0.69	1092.88	140.242	4387.55
SAU	Saudi Arabia	50349.9	47	3.24	84.065	204	4	176.87	7.4	4.08035	40.01	177.15	11.4	42.9	37.74	6.44	2173.33	337.592	9298.81
SDN	Sudan	5961.44	47	0.55	34.936	414	2	7.17	7.8	5.95803	110.61	153.55	8.64	30.7	8.44	1.17
SEN	Senegal	2979.29	64	0.56	47.653	466	2	16.41	6.6	6.97806	93.2	116.68	8.19	49.9	8.83	0.99	1850.12	296.984	6581.69
SLE	Sierra Leone	1356.32	69	0.29	42.484	537	1		8.2	0.945323	132.4	112.69	2.91	48	8.93	1.06	1501.3	270.576	6035.47
SLV	El Salvador	2843.22	48	1.85	72.746	337	3	132.38	9.3	2.62525	83.88	130.14	10.73	22.7	24.82	1.31	1721.27	195.134	7163.38
SRB	Serbia	7418.76	42	6.16	56.26	278	3	244.79	7.4	1.45649	65.25	207.4	33.16	27.2	22.33	3.46	1679.88	224.665	6823.88
SUR	Suriname	39097.6	43	3.3	66.095	239	4	217.71	7.3	-1.81494	61.86	101.57	14.92	24.1	27.32	2.92	1977.31	276.135	8747.08
SVK	Slovakia	57081.8	29	15.5	53.729	144	4	125.76	4.1	-0.918475	48.37	188.12	43.33	26.6	21.28	4.5	1998.45	222.446	9237.25
SVN	Slovenia	20613.9	40	14.41	54.822	205	4	258.94	7.6	-1.16629	42.8	142.36	49.55	24.4	21	4.39	2757.35	364.428	13436.2
SWE	Sweden	108588	29	13.87	87.708	58	5	96.34	7.5	-1.98019	39.78	155.13	51.39	15.4	21.36	7.7	2991.97	383.367	11530.8
SWZ	Swaziland	14407.3	59	0.7	23.981	428	2		2.6	2.30064	60.31	40.41	19.08	27.2	16.43	1.78
TCD	Chad	1536.5	62	0.36	23.279	540	1		8.1	3.19481	167.77	19.96	10.7	47.7	6.29	1.52	2585.76	242.587	6199.86
TGO	Togo	1071.94	68	0.41	42.248	533	1	11.03	6.1	4.58909	424.9	56.18	4.67	48.9	8.55	0.83	1513.59	149.391	3960.58
THA	Thailand	3288.28	48	1.88	50.692	385	2	161.71	6.7	3.01422	80.77	91.71	14.65	31.8	10.26	2.49	1485.05	395.706	8354.85
TJK	Tajikistan	1819.06	58	0.62	27.309	493	1	81.38	6.6	-1.36728	133.63	283.57	10.05	30.5	14.73	0.72	909.211	236.212	3909.56
TKM	Turkmenistan	4737.73	57	9.95	52.048	340	3		7.6	5.71425		339.63	51.98	32.6	19.17	5.34	3713.7	411.952	14480.1
TTO	Trinidad and Tobago	6356.08	39	8.06	53.187	268	3	356	3.6	1.32996	55.16	65.6	14.58	23.6	19.17	9.12
TUN	Tunisia	9806.34	49	2.64	69.254	302	3	59.25	9.7	-3.66972	67.78	401.6	9.78	31.2	27.75	1.5	2331.77	569.128	10529.2
TUR	Turkey	16808.7	42	20.33	75.63	162	4	137.71	17	-5.83134	45.4	408.19	11.19	30.9	33	2.71	1900.45	438.691	9288.13
TZA	Tanzania	673.229	56	0.28	34.5	537	1	12.6	13.6	4.23884	104.11	91.21	7.14	37.2	8.69	1.18	2921.7	162.017	5532.96
UGA	Uganda	910.676	45	0.87	24.361	462	2	1.91	10.1	2.54651	197.15	58.46	9.85	28.5	5.46	1.03	1413.07	135.431	5763.63
UKR	Ukraine	5514.97	48	7	69.473	276	3	52.75	2.5	-12.899		267.9	23.81	23.5	24.74	4	1961.91	225.239	10292.8
URY	Uruguay	24852.9	39	11.45	95.426	120	5	143.67	12.3	-0.404839	40.81	107.04	43.38	20.8	28.8	9.43	4719.8	293.05	15609.7
USA	United States Of America	79536.2	24	8.27	82.459	85	5	138.6	6.4	2.23959	44.27	200.14	52.41	13.3	37.32	7.95	2815.77	279.927	14943.7
UZB	Uzbekistan	5737.38	52	0.46	50.433	417	2	232.7	5.7	-9.14253		440.26	27.86	36.2	17.12	1.75	1573.52	392.101	5490.86
VCT	St Vincent and the Grenadines	10066.5	39	5.44	52.614	275	3		0	-0.445949	94.85	107.36	15.91	24.5	24.74
VEN	Venezuela	21767.1	43	2.41	88.24	203	4	183.47	17.4	-18.8973		111.49	27.22	23.9	26.48	2.26	3799.94	286.718	12500.1
VNM	Vietnam	1306.46	55	2.86	36.628	454	2	429.79	9	7.76925	117.49	273.23	30.76	24.2	2.19	1.68	1823.96	449.309	11100.3
VUT	Vanuatu	2681.77	47	1.37	25.394	430	2		0	2.37016		58.74	15.2	24	26.09
WSM	Samoa	4744.88	28	1.53	18.056	344	3	4.64	0	1.12458		73.34	18.37	31.3	48.95	1.47
YEM	Yemen	1025.13	65	0.26	37.273	548	1	16.4	6.8	1.21779		64.62	7.23	69.6	17.72	0.39	1153.74	212.265	5279.77
ZAF	South Africa	11077.1	53	5.24	66.856	294	3	58.51	8.1	2.35402	100.71	82.74	26.56	25.8	28.49	3.38	2919.45	283.121	10175.8
ZMB	Zambia	519.443	70	0.61	44.072	530	1	89.59	8.5	-0.257572	199.48	58.53	7.56	33.7	8.36	0.77	5102.64	105.908	5722.1
ZWE	Zimbabwe	413.616	61	0.43	32.21	546	1	22.9	8.9	2.46211	168.2	32.45	10.6	28.8	15.63	0.87	3405.48	143.313	6913.81

## Sheet: Sources
No	Indicator	Unit	Year	Accessed on	Source	URL
1	Agriculture, forestry, and fishing, value added per worker	constant 2010 US $	2010 - 2019	October, 2020	World Bank, OECD, ILO	https://data.worldbank.org/indicator/NV.AGR.EMPL.KD.
2	Share of dietary energy from cereals, roots, and tubers	%	2016	October, 2020	FAO	http://www.fao.org/faostat/en/#data/FS
3	Supermarkets per 100,000 inhabitants	supermarkets	2018	October, 2020	Euromonitor Passport Database	https://foodsystemsdashboard.org/compareandanalyze
4	Urban population (percent of total population)	%	2019	October, 2020	United Nations Population Division, World Bank	https://data.worldbank.org/indicator/SP.URB.TOTL.IN.ZS
5	GDP per capita, PPP	current international $	2010 - 2019	October, 2020	World Bank	https://data.worldbank.org/indicator/NY.GDP.PCAP.PP.CD
6	Land area	sq. km.	2018	October, 2020	FAO	https://data.worldbank.org/indicator/AG.LND.TOTL.K2
7	Population, total	population	2019	October, 2020	United Nations Population Division, World Bank	https://data.worldbank.org/indicator/SP.POP.TOTL
8	Income group classification		2020	October, 2020	World Bank	http://databank.worldbank.org/data/download/site-content/CLASS.xls
9	Fertilizer consumption	kg per arable ha	2016	October, 2020	FAO	https://data.worldbank.org/indicator/AG.CON.FERT.ZS
10	Vegetable losses	% (of production and imports, when imports are >10% of production)	2018	October, 2020	FAO	http://www.fao.org/faostat/en/#data/FBS
11	Average annual growth in ultra-processed food sales, 5 years	%	2018	October, 2020	Euromonitor Passport Database	https://foodsystemsdashboard.org/compareandanalyze	(available on Food Sytems Dashboard as 5-year growth %, not compound growth)
12	Cost of a healthy diet, as a percent of food expenditure	%	2020	October, 2020	FAO, IFAD, UNICEF, WFP, and WHO (SOFI report)	n/a
13	Vegetable intake	grams/person/day	2017	2020	GBD 2017 Risk Factor Collaborators	https://foodsystemsdashboard.org/compareandanalyze
14	Red meat intake	grams/person/day	2017	2020	GBD 2017 Risk Factor Collaborators	https://foodsystemsdashboard.org/compareandanalyze
15	Anaemia prevalence among women of reproductive age	%	2016	October, 2020	WHO	https://apps.who.int/gho/data/view.main.ANAEMIAWOMENPREVANEMIAv.
16	Obesity prevalence among adults	%	2016	October, 2020	NCD Risk Factor Collaboration (Abarca-Gómez et al)	https://foodsystemsdashboard.org/compareandanalyze
17	Ecological footprint of production	global hectares/person/year	2019	March, 2021	Global Footprint Network	http://data.footprintnetwork.org/
18	GHG emissions from food production	kg CO2-eq/person/year	2010	March, 2021	WWF, Poore and Nemecek	https://foodsystemsdashboard.org/compareandanalyze
19	Water use from food production	Liters/person/year	2010	March, 2021	WWF, Poore and Nemecek	https://foodsystemsdashboard.org/compareandanalyze
20	Eutrophication from food production	Grams PO43-eq/person/year	2010	March, 2021	WWF, Poore and Nemecek	https://foodsystemsdashboard.org/compareandanalyze
